# Supplementary material for: Metabolic Features of a Novel Trichoderma asperellum YNQJ1002 with Potent Antagonistic Activity against Fusarium graminearum
Source: MDPI journal article supplement (doi:10.3390/metabo13111144), 2023-11-11
Supplement: s1 [file s1]

**Figure S1:** The phenotype of *Trichoderma* strains inhibiting the growth of *F. graminearum*. (a) The phenotype of 13 sporogenous *Trichoderma* strains with inhibition effect on *F. graminearum*; (b) Inhibition rates of 13 sporogenesis *Trichoderma* strains on the growth of *F. graminearum*; (c) The phenotype of 15 filamentous *Trichoderma* strains inhibiting the growth of *F. graminearum*; (d) Inhibition rate of 15 filamentous *Trichoderma* strains

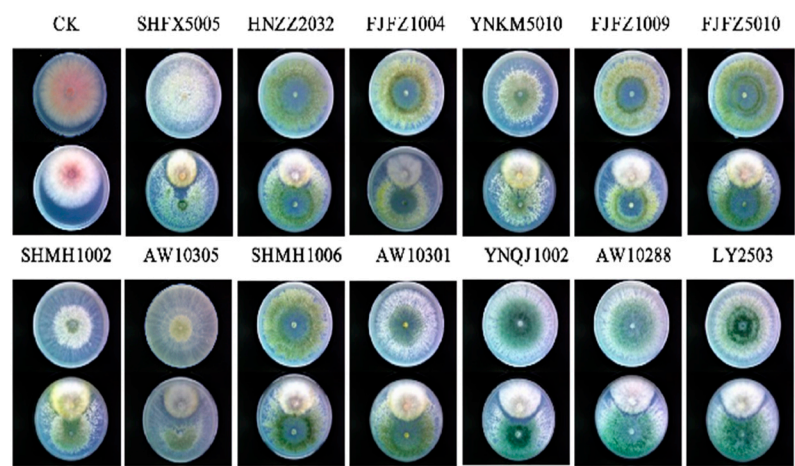

(a)

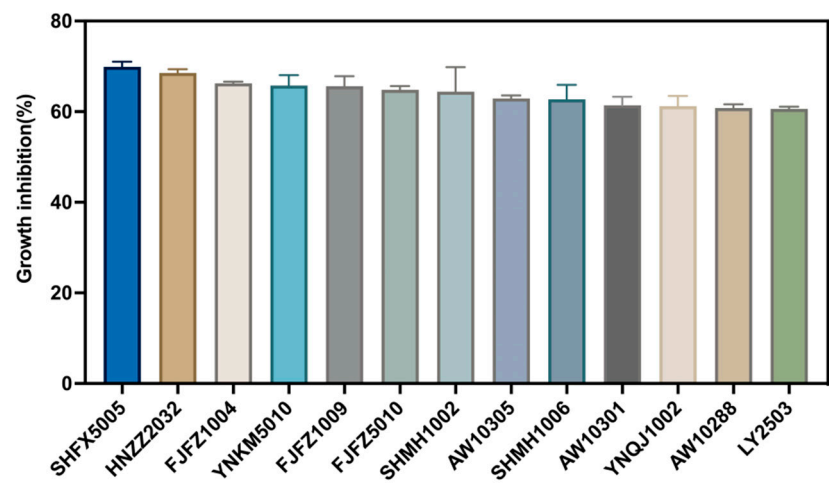

(b)

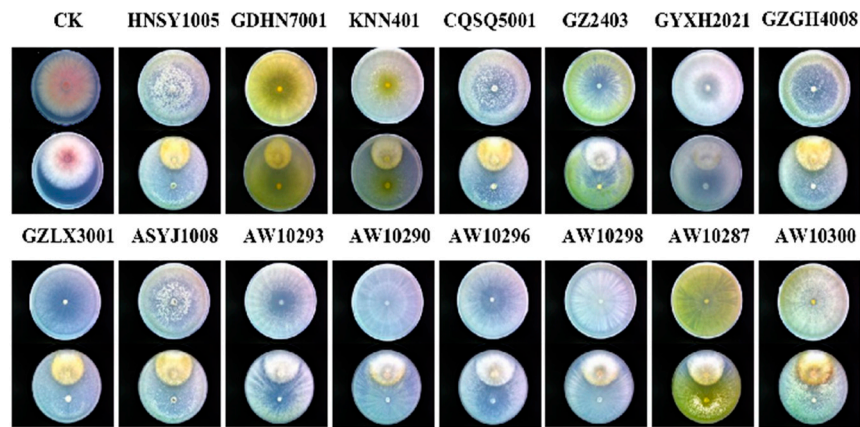

(c)

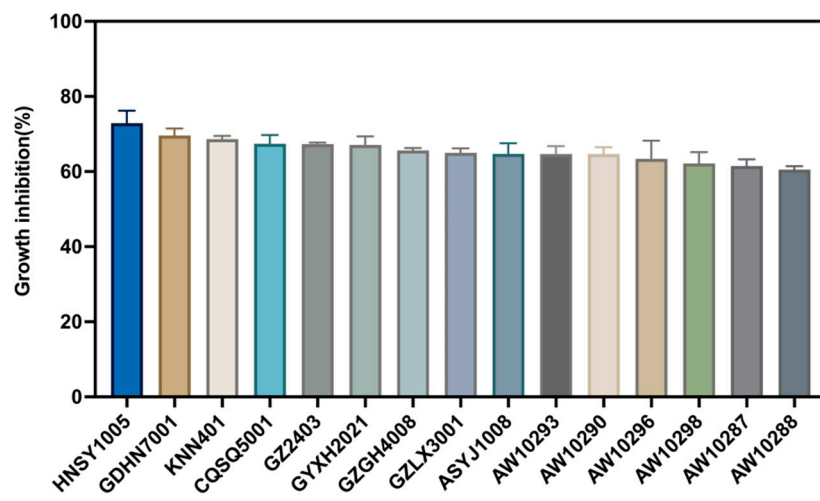

(d)
