# Supplementary material for: Metabolic Features of a Novel Trichoderma asperellum YNQJ1002 with Potent Antagonistic Activity against Fusarium graminearum
Source: Metabolites. 2023 Nov 11;13(11):1144. doi: 10.3390/metabo13111144 (PMC10673152; doi:10.3390/metabo13111144)
Supplement: Supplementary file 1 [file metabolites-13-01144-s001.zip › metabolites-2633373-supplementary.xlsx]

## Sheet: Table S1
	Table S1 The original Information of 109 Trichoderma strains tested（* A: filamentous ；B：sporogeneses）
	Stains	Name	Source	Sampling type	Type*	Note*
1	CTCCSJ-W-AW10307	AW10307	Hainan	Wetland	B	filamentous（A）
2	CTCCSJ-W-AW10306	AW10306	Hainan	Wetland	A	sporogeneses（B）
3	CTCCSJ-W-AW10305	AW10305	Hainan	Wetland	B
4	CTCCSJ-W-AW10304	AW10304	Hainan	Wetland	A
5	CTCCSJ-W-AW10303	AW10303	Hainan	Wetland	B
6	CTCCSJ-W-AW10302	AW10302	Hainan	Wetland	A
7	CTCCSJ-W-AW10301	AW10301	Hainan	Wetland	B
8	CTCCSJ-W-AW10300	AW10300	Hainan	Wetland	A
9	CTCCSJ-W-AW10299	AW10299	Hainan	Wetland	B
10	CTCCSJ-W-AW10298	AW10298	Hainan	Wetland	A
11	CTCCSJ-W-AW10297	AW10297	Hainan	Wetland	B
12	CTCCSJ-W-AW10296	AW10296	Hainan	Wetland	A
13	CTCCSJ-W-AW10295	AW10295	Hainan	Wetland	B
14	CTCCSJ-W-AW10294	AW10294	Hainan	Wetland	A
15	CTCCSJ-W-AW10293	AW10293	Hainan	Wetland	A
16	CTCCSJ-W-AW10292	AW10292	Hainan	Wetland	B
17	CTCCSJ-W-AW10291	AW10291	Hainan	Wetland	B
18	CTCCSJ-W-AW10290	AW10290	Hainan	Wetland	A
19	CTCCSJ-W-AW10289	AW10289	Hainan	Wetland	B
20	CTCCSJ-W-AW10288	AW10288	Hainan	Wetland	B
21	CTCCSJ-W-AW10287	AW10287	Hainan	Wetland	A
22	CTCCSJ-NR-ZJSX2009	ZJSX2009	Zhejiang	soil	B
23	CTCCSJ-NR-YZ2604	YZ2604	Yangzhou	soil	B
24	CTCCSJ-NR-YNQJ1003	YNQJ1003	Yunnan	Vegetables	B
25	CTCCSJ-NR-YNQJ1002	YNQJ1002	Yunnan	Vegetables	B
26	CTCCSJ-NR-YNKM5010	YNKM5010	Yunnan	Vegetables	B
27	CTCCSJ-NR-XZNM5001	XZNM5001	Tibet	forage grass	B
28	CTCCSJ-NR-XZNM4003	XZNM4003	Tibet	forage grass	B
29	CTCCSJ-NR-XZNM3026	XZNM3026	Tibet	forage grass	B
30	CTCCSJ-NR-XZNM3003	XZNM3003	Tibet	forage grass	B
31	CTCCSJ-NR-WZ1204	WZ1204	Wenzhou	forest	B
32	CTCCSJ-NR-WZ1101	WZ1101	Wenzhou	forest	B
33	CTCCSJ-NR-SZHQ406	SZHQ406	Suzhou	forest	B
34	CTCCSJ-NR-SHQP207	SHQP207	Shanghai	forest	B
35	CTCCSJ-NR-SHMH2021	SHMH2021	Shanghai	forest	B
36	CTCCSJ-NR-SHMH1006	SHMH1006	Shanghai	forest	B
37	CTCCSJ-NR-SHMH1002	SHMH1002	Shanghai	forest	B
38	CTCCSJ-NR-SHJD503	SHJD503	Shanghai	forest	B
39	CTCCSJ-NR-SHFX5005	SHFX5005	Shanghai	forest	B
40	CTCCSJ-NR-SHBS2002	SHBS2002	Shanghai	forest	A
41	CTCCSJ-NR-SG3404	SG3404	Suzhou	Soil	B
42	CTCCSJ-NR-SCGA3001	SCGA3001	Sichuang	Soil	A
43	CTCCSJ-NR-NP2203	NP2203	Menggu	forage grass	B
44	CTCCSJ-NR-NMBT1005	NMBT1005	Menggu	forage grass	B
45	CTCCSJ-NR-NB3308	NB3308	Zhejiang	Soil	B
46	CTCCSJ-NR-NB2106	NB2106	Zhejiang	Soil	B
47	CTCCSJ-NR-NB1503	NB1503	Zhejiang	Soil	B
48	CTCCSJ-NR-NB1305	NB1305	Zhejiang	Soil	B
49	CTCCSJ-NR-NB1213	NB1213	Zhejiang	Soil	B
50	CTCCSJ-NR-NB1107	NB1107	Zhejiang	Soil	B
51	CTCCSJ-NR-NB1102	NB1102	Zhejiang	Soil	B
52	CTCCSJ-NR-NB1002	NB1002	Zhejiang	Soil	B
53	CTCCSJ-NR-LYZ1102	LYZ1102	Huadong	farmland	B
54	CTCCSJ-NR-LYI2206	LYI2206	Huadong	farmland	A
55	CTCCSJ-NR-LYI1110	LYI1110	Huadong	farmland	B
56	CTCCSJ-NR-LY2503	LY2503	Huadong	farmland	B
57	CTCCSJ-NR-KNN401	KNN401	Huadong	farmland	A
58	CTCCSJ-NR-JLDH1003	JLDH1003	Huadong	farmland	A
59	CTCCSJ-NR-HZ1301	HZ1301	Huadong	farmland	B
60	CTCCSJ-NR-HZ1102	HZ1102	Huadong	farmland	B
61	CTCCSJ-NR-HZ1101	HZ1101	Huadong	farmland	B
62	CTCCSJ-NR-HNZZ2032	HNZZ2032	Hunan	Vegetables	B
63	CTCCSJ-NR-HNSY1005	HNSY1005	Hunan	Vegetables	A
64	CTCCSJ-NR-HNLY1002	HNLY1002	Hunan	Vegetables	B
65	CTCCSJ-NR-HNHL4002	HNHL4002	Hunan	Vegetables	A
66	CTCCSJ-NR-HNCD5001	HNCD5001	Hunan	Vegetables	B
67	CTCCSJ-NR-HM2204	HM2204	Hunan	Vegetables	B
68	CTCCSJ-NR-HF2503	HF2503	Hunan	Vegetables	B
69	CTCCSJ-NR-HBJZ5001	HBJZ5001	Hubei	Vegetables	B
70	CTCCSJ-NR-HBJZ1008	HBJZ1008	Hubei	Vegetables	B
71	CTCCSJ-NR-GZLX3001	GZLX3001	Guangzhou	forest	A
72	CTCCSJ-NR-GZGH4008	GZGH4008	Guangzhou	forest	A
73	CTCCSJ-NR-GZGH4006	GZGH4006	Guangzhou	forest	B
74	CTCCSJ-NR-GZGH4004	GZGH4004	Guangzhou	forest	B
75	CTCCSJ-NR-GZGH2008	GZGH2008	Guangzhou	forest	A
76	CTCCSJ-NR-GZ2403	GZ2403	Guangzhou	forest	A
77	CTCCSJ-NR-GYXH2021	GYXH2021	Guangxi	farmland	A
78	CTCCSJ-NR-GXNN3001	GXNN3001	Guangxi	farmland	B
79	CTCCSJ-NR-GXNN2007	GXNN2007	Guangxi	farmland	A
80	CTCCSJ-NR-GXHX1007	GXHX1007	Guangxi	farmland	B
81	CTCCSJ-NR-GXBS5001	GXBS5001	Guangxi	farmland	B
82	CTCCSJ-NR-GXBS2001	GXBS2001	Guangxi	farmland	B
83	CTCCSJ-NR-GDQZ3003	GDQZ3003	Guangdong	forest	B
84	CTCCSJ-NR-GDNQ4001	GDNQ4001	Guangdong	forest	B
85	CTCCSJ-NR-GDHN7001	GDHN7001	Guangdong	forest	A
86	CTCCSJ-NR-GDHN3001	GDHN3001	Guangdong	forest	B
87	CTCCSJ-NR-GDHN1003	GDHN1003	Guangdong	forest	B
88	CTCCSJ-NR-GDFS1009	GDFS1009	Guangdong	forest	B
89	CTCCSJ-NR-FJFZ5010	FJFZ5010	Fujian	soil	B
90	CTCCSJ-NR-FJFZ1009	FJFZ1009	Fujian	soil	B
91	CTCCSJ-NR-FJFZ1004	FJFZ1004	Fujian	soil	B
92	CTCCSJ-NR-DS8	DS8	Fujian	soil	B
93	CTCCSJ-NR-CQSQ5006	CQSQ5006	Chongqing	forage grass	A
94	CTCCSJ-NR-CQSQ5003	CQSQ5003	Chongqing	forage grass	B
95	CTCCSJ-NR-CQSQ5002	CQSQ5002	Chongqing	forage grass	B
96	CTCCSJ-NR-CQSQ5001	CQSQ5001	Chongqing	forage grass	A
97	CTCCSJ-NR-CQSQ4010	CQSQ4010	Chongqing	forage grass	B
98	CTCCSJ-NR-CQJB5015	CQJB5015	Chongqing	forage grass	B
99	CTCCSJ-NR-CQJB5009	CQJB5009	Chongqing	forage grass	B
100	CTCCSJ-NR-CQJB5003	CQJB5003	Chongqing	forage grass	B
101	CTCCSJ-NR-CQJB5002	CQJB5002	Chongqing	forage grass	B
102	CTCCSJ-NR-CQJB5001	CQJB5001	Chongqing	forage grass	B
103	CTCCSJ-NR-CQBN5007	CQBN5007	Chongqing	forage grass	B
104	CTCCSJ-NR-CQBN4006	CQBN4006	Chongqing	forage grass	B
105	CTCCSJ-NR-CDJJ4002	CDJJ4002	Shanghai	forest	A
106	CTCCSJ-NR-CDJJ1008	CDJJ1008	Shanghai	forest	B
107	CTCCSJ-NR-ASYJ1008	ASYJ1008	Huanan	forest	A
108	CTCCSJ-F-KY10039	KY10039	Yunnan	forest	A

## Sheet: Table S2
Table S2: Inhibition effect of 29 A-typeTrichoderma on F. graminearum
	Strains	Inhibition rate
1	HNSY1005	72. 86±5. 83
2	GDHN7001	69. 61±5. 57
3	KNN401	68. 62±5. 49
4	CQSQ5001	67. 42±5. 39
5	GZ2403	67. 25±5. 38
6	GYXH2021	67. 06±5. 36
7	GZGH4008	65. 63±5. 25
8	GZLX3001	64. 98±5. 20
9	ASYJ1008	64. 69±5. 18
10	AW10293	64. 65±5. 17
11	AW10290	64. 64±5. 17
12	AW10296	63. 37±5. 07
13	AW10298	62. 18±4. 97
14	AW10287	61. 46±4. 92
15	AW10300	60. 50±4. 84
16	JLDH1003	59. 28±4. 74
17	AW10304	57. 93±4. 63
18	GXNN2007	57. 65±4. 61
19	CQSQ5006	57. 43±4. 59
20	SCGA3001	57. 31±4. 58
21	LYI2206	56. 58±4. 53
22	GZGH2008	56. 40±4. 51
23	KY10039	55. 53±4. 44
24	AW10306	54. 79±4. 38
25	SHBS2002	51. 57±4. 13
26	AW10294	50. 83±4. 07
27	AW10302	50. 80±4. 06
28	HNHL4002	50. 38±4. 03
29	CDJJ4002	45. 59±3. 65

## Sheet: Table S3
Table S3: Inhibition effect of 79 B-typeTrichoderma on F. graminearum
	Strains	Inhibition rate
1	SHFX5005	69. 88±5. 59
2	HNZZ2032	68. 56±5. 48
3	FJFZ1004	66. 27±5. 30
4	YNKM5010	65. 78±5. 26
5	FJFZ1009	65. 62±5. 25
6	FJFZ5010	64. 82±5. 19
7	SHMH1002	64. 43±5. 15
8	AW10305	62. 88±5. 03
9	.SHMH1006	62.73±5.02
10	AW10301	61.41±4.91
11	YNQJ1002	61.20±4.90
12	AW10288	60.78±4.86
13	LY2503	60.60±4.85
14	HZ1301	58. 63±4. 69
15	CQJB5002	58. 37±4. 67
16	ZJSX2009	58. 31±4. 66
17	GDFS1009	54. 78±4. 38
18	HM2204	54. 73±4. 38
19	HZ1101	54. 61±4. 37
20	GXHX1007	54. 41±4. 35
21	AW10289	54. 29±4. 34
22	SHMH2021	54. 26±4. 34
23	NB1107	54. 11±4. 33
24	NB1002	53. 53±4. 28
25	CQJB5009	53. 45±4. 28
26	GDHN3001	53. 26±4. 26
27	AW10295	52. 56±4. 20
28	SHQP207	52. 44±4. 20
29	GZGH4004	52. 38±4. 19
30	GDNQ4001	52. 29±4. 18
31	YZ2604	49. 90±3. 99
32	CQSQ5003	49. 45±3. 96
33	CQBN5007	48. 94±3. 92
34	XZNM3003	48. 76±3. 90
35	AW10307	48. 61±3. 89
36	AW10303	48. 33±3. 87
37	DS8	48. 24±3. 86
38	CQJB5003	48. 22±3. 86
39	HF2503	47. 29±3. 78
40	NB2106	46. 74±3. 74
41	SHJD503	45. 62±3. 65
42	NB3308	45. 23±3. 62
43	HBJZ1008	44. 24±3. 54
44	XZNM4003	43. 93±3. 51
45	CQSQ5002	43. 91±3. 51
46	AW10292	57. 92±4. 63
47	GXNN3001	57. 07±4. 57
48	HBJZ5001	56. 85±4. 55
49	SG3404	56. 42±4. 51
50	CQSQ4010	56. 30±4. 50
51	SZHQ406	56. 08±4. 49
52	AW10297	56. 04±4. 48
53	GXBS5001	55. 92±4. 47
54	AW10299	55. 58±4. 45
55	XZNM3026	55. 41±4. 43
56	GXBS2001	55. 40±4. 43
57	HNCD5001	54. 94±4. 39
58	NB1503	52. 13±4. 17
59	CQJB5001	51. 87±4. 15
60	LYZ1102	51. 72±4. 14
61	GZGH4006	51. 65±4. 13
62	HNLY1002	51. 28±4. 10
63	LYI1110	51. 01±4. 08
64	GDHN1003	50. 95±4. 08
65	CQBN4006	50. 94±4. 08
66	NB1213	50. 78±4. 06
67	CQJB5015	50. 67±4. 05
68	AW10291	50. 32±4. 03
69	HZ1102	50. 29±4. 02
70	NP2203	42. 83±3. 43
71	NMBT1005	42. 61±3. 41
72	GDQZ3003	42. 50±3. 40
73	NB1102	40. 96±3. 28
74	XZNM5001	40. 01±3. 20
75	YNQJ1003	39. 62±3. 17
76	NB1305	38. 44±3. 08
77	CDJJ1008	36. 96±2. 96
78	WZ1101	30. 55±2. 44
79	WZ1204	28. 29±2. 26

## Sheet: Table S4
Table S4 Qualitative comprenhensive information of representative metabolites based on the LC-MS/MS
ID	m/z	Retention time (min)	Ion mode	Metabolites	Compound ID	Super Class	Class	Sub Class	level	kegg	Score	Fragmentation Score	Adducts	Formula	Mass Error (ppm)	GZLX3001-1	GZLX3001-2	GZLX3001-3	AVE-GZ	YNQJ1002-1	YNQJ1002-2	YNQJ1002-3	AVE-YN
7.28_938.5305m/z	938.53	7.27727	pos	Trigoneoside Xb	HMDB0036484	Lipids and lipid-like molecules	Fatty Acyls	Fatty acyl glycosides			53	69	M+NH4	C45H76O19	-1.53367	1.05e-10	1.05e-10	1.05e-10	1.05e-10	1796.47	1932.38	1977.02	1901.96
2.17_158.0601m/z	158.06	2.16752	pos	5-Hydroxyindoleacetaldehyde	HMDB0004073	Organoheterocyclic compounds	Indoles and derivatives	Hydroxyindoles	**	C05634	51.6	60.8	M+H-H2O	C10H9NO2	0.606959	1.05e-10	1.05e-10	1.05e-10	1.05e-10	653.19	589.482	411.709	551.46
7.41_940.5772m/z	940.577	7.4148	pos	Everolimus	HMDB0015529	Phenylpropanoids and polyketides	Macrolide lactams	Unclassified			49.1	72.5	M+H-H2O	C53H83NO14	-0.856256	1.05e-10	1.05e-10	1.05e-10	1.05e-10	381.023	337.259	298.727	339.003
2.15_107.0492m/z	107.049	2.1469	pos	trans,trans-hepta-2,4,6-trienoic acid	LMFA01030781	Lipids and lipid-like molecules	Fatty Acyls	Fatty Acids and Conjugates			57.9	95.3	M+H-H2O	C7H8O2	0.453456	1.05e-10	1.05e-10	1.05e-10	1.05e-10	47.7496	50.8052	45.0159	47.8569
1.86_134.0966m/z	134.097	1.85997	pos	2-AI	96600	Unclassified	Unclassified	Unclassified			50.7	64.5	M+H	C9H11N	1.14283	1.05e-10	1.05e-10	1.05e-10	1.05e-10	4.49674	4.77451	4.74375	4.67167
7.71_922.5350m/z	922.535	7.7106	pos	Torvoside A	HMDB0041528	Lipids and lipid-like molecules	Prenol lipids	Terpene lactones			52.6	68	M+NH4	C45H76O18	-2.24807	58.3731	31.5209	21.842	37.2453	11802.9	11191.3	12075.6	11690
6.89_938.5320m/z	938.532	6.89408	pos	Trigofoenoside B	HMDB0039485	Lipids and lipid-like molecules	Prenol lipids	Terpene glycosides			47.4	51	M+NH4	C45H76O19	0.0639694	68.7917	15.3472	5.66914	29.936	3487.87	2474.65	3188.93	3050.48
1.52_160.0757m/z	160.076	1.52295	pos	6-Methoxyquinoline	34519	Unclassified	Unclassified	Unclassified			53	69.4	M+H	C10H9NO	0.078463	1.05e-10	1.78993	3.55612	1.78202	112.955	134.764	109.572	119.097
4.32_234.1856m/z	234.186	4.32497	pos	(R)-ar-Turmerone	HMDB0035612	Lipids and lipid-like molecules	Prenol lipids	Sesquiterpenoids			48.7	51.8	M+NH4	C15H20O	1.43417	0.850174	4.22189	0.449765	1.84061	89.1881	96.581	60.8063	82.1918
7.29_523.3244m/z	523.324	7.29103	pos	Frangulanine	HMDB0030199	Organic acids and derivatives	Carboxylic acids and derivatives	Amino acids, peptides, and analogues		C10003	47.6	54.9	M+Na	C28H44N4O4	-2.07413	107.178	3.60908	2.5263	37.7712	1323.96	1281.98	1197.28	1267.74
3.51_185.1324m/z	185.132	3.5078	pos	Chamazulene	41200	Lipids and lipid-like molecules	Prenol lipids	Sesquiterpenoids		C09633	50.2	53.9	M+H	C14H16	-0.259282	7.15664	7.71756	5.50569	6.7933	31.5325	25.6223	19.9735	25.7094
3.53_626.4234m/z	626.423	3.52843	pos	Torvoside G	HMDB0030337	Lipids and lipid-like molecules	Glycerolipids	Triradylcglycerols			46.3	47.3	M+NH4	C34H56O9	-4.69342	232.509	45.7764	25.1232	101.136	1100.52	831.13	940.724	957.457
2.95_340.2820m/z	340.282	2.945	pos	Phytosphingosine	LMSP01030001	Organic nitrogen compounds	Organonitrogen compounds	Amines	**	C12144	49.9	51.3	M+Na	C18H39NO3	-0.649566	2670.7	2365.5	2402.22	2479.47	991.34	1250.17	1279.29	1173.6
3.90_385.1985m/z	385.198	3.89997	pos	Sorbitan laurate	LMFA07011017	Lipids and lipid-like molecules	Fatty Acyls	Fatty acid esters			46.9	40.6	M+K	C18H34O6	-0.620752	77.964	112.415	113.082	101.154	2.74947	8.56446	14.9852	8.76636
5.61_218.1664n	201.163	5.6096	pos	Curlone	92045	Lipids and lipid-like molecules	Prenol lipids	Sesquiterpenoids			46.6	42.5	M+H-H2O, M+H	C15H22O	-3.06044	51.0082	39.1156	40.7205	43.6147	0.211538	1.05e-10	1.05e-10	0.0705125
The substances scores above 50 were highlighted

## Sheet: Table S5
Table S5 The total ion current for strain GZLX3001 and YNJQ1002

## Sheet: Table S6
Table S6 Tandem Mass Spectra for selected specific compounds in Strian GZLX3001
															Sorbitan laurate
															Curlone
															phytosphingosine

## Sheet: Table S7
Table S7 Tandem Mass Spectra for selected specific compounds in Strian YNJQ1002
															6-Methoxyquinoline
															Trigoneoside Xb
															Torvoside A
															5-Hydroxyindoleacetaldehyde
															2-AI
															Everolimus
															(R)-ar-Turmerone
															Frangulanine
															Trigofoenoside B
															Torvoside G
															Chamazulene
															trans, trans-hepta-2, 4, 6-trienoic acid
